# Supplementary material
Source: publisher figshare collection journal article supplement (https://diabetesjournals.figshare.com/ndownloader/files/41039846)
Supplement: Supplementary file 1 [file 41039846]

1  
2  
3  
4  
5  
6  
7  
8  
9  
10  
11  
12  
13  
14  
15

**Supplemental Materials**

**PRMT4 facilitates white adipose tissue browning and thermogenesis by  
methylating PPAR $\gamma$**

**Short title:** PRMT4 promotes WAT browning

Yi Zhong, Yilong Wang, Xiaoguang Li, Haojie Qin, Shu Yan, Caijun Rao, Di Fan,  
Duqiu Liu, Fei Deng, Yanli Miao, Ling Yang, Kai Huang

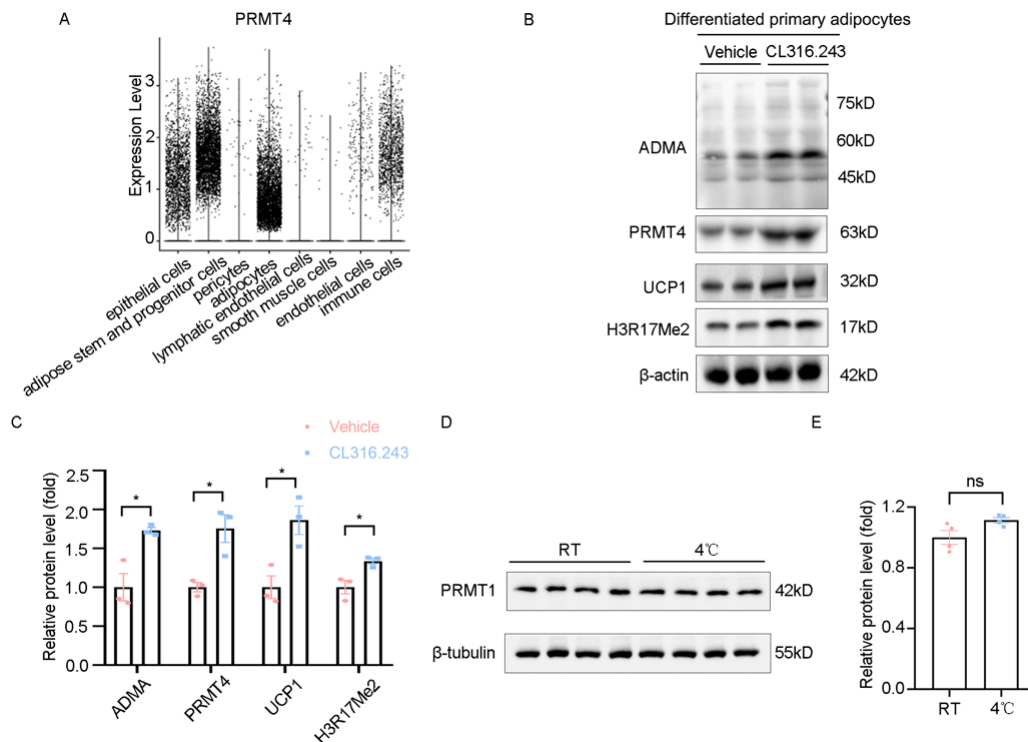

**Supplemental Fig. 1**

**Levels of PRMT4 but not that of PRMT1 increased during iWAT browning.**

**A**, Expression level of PRMT4 in each cell type of subcutaneous adipose tissue. **B**, SVF cells were isolated from iWAT of C57BL/6J mice and differentiated for 6 days into mature adipocytes, and then treated with CL316,243 (2  $\mu$ M) for 4 h before harvested. Representative immunoblotting images of the expression levels of ADMA, PRMT4, UCP1, and H3R17Me2 in the differentiated primary adipocytes. **C**, Quantitative analysis of the protein level of ADMA, PRMT4, UCP1, and H3R17Me2 in panel B. **D**, Representative immunoblotting images displaying the expression levels of PRMT1 in iWAT from mice hosted at RT or 4  $^{\circ}$ C for 24 h. **E**, Quantitative analysis of the protein level of PRMT1 in panel D. Data are presented as mean  $\pm$  SEM. \* $P$ <0.05, ns, non-significant.

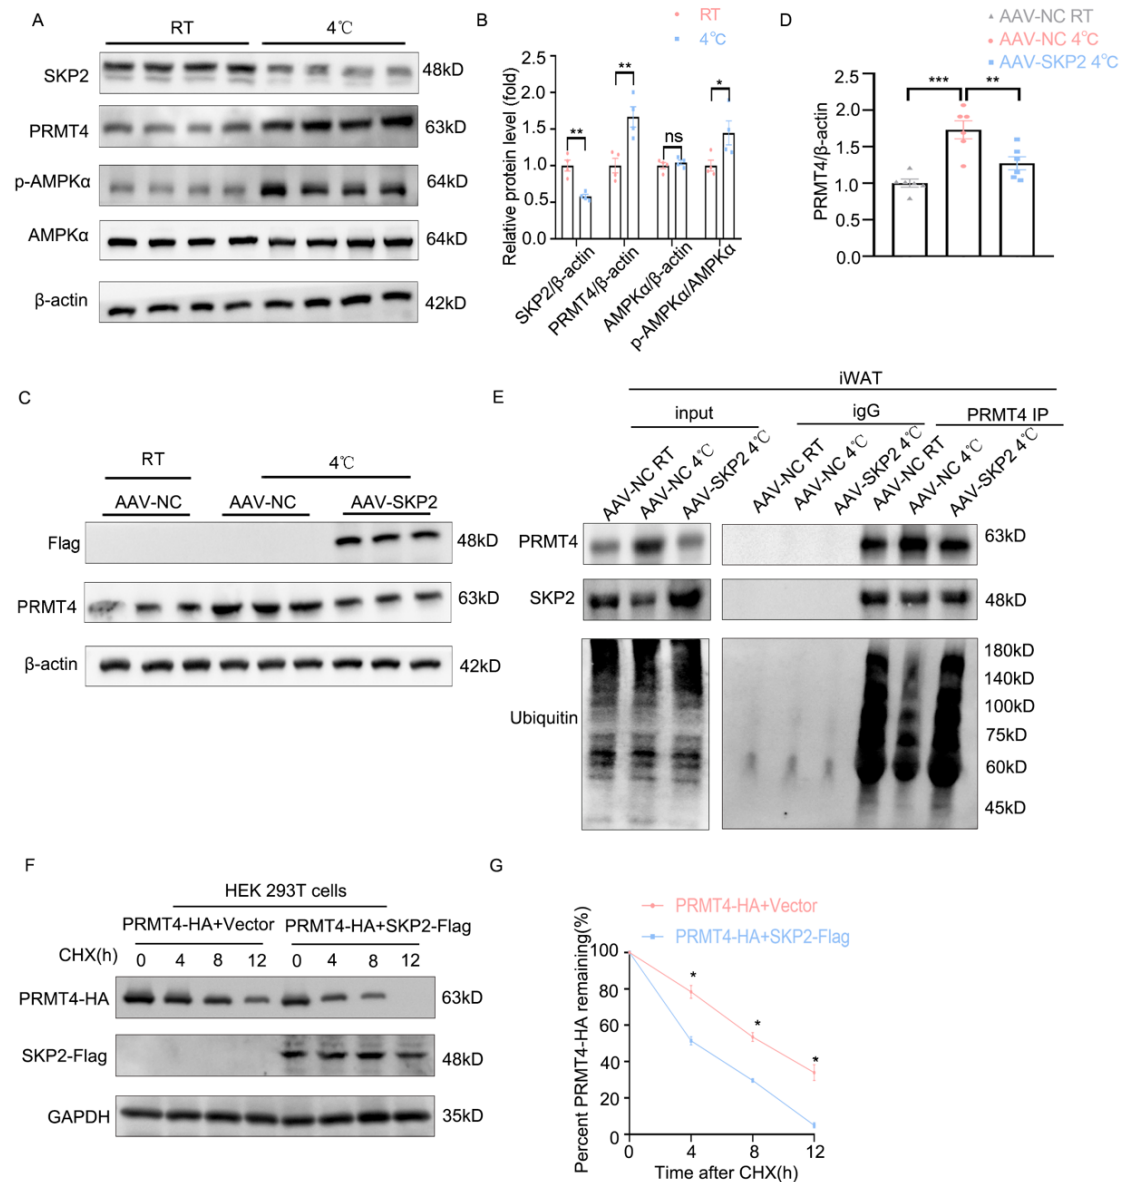

**Supplemental Fig. 2**

**AMPKα-SKP2 axis was responsible for PRMT4 accumulation in thermogenic program.**

**A**, Representative immunoblotting images of the expression levels of SKP2, PRMT4, p-AMPKα, and AMPKα in iWAT from mice hosted at RT or 4 °C for 24 h. **B**, Quantitative analysis of SKP2 and PRMT4 protein level as well as AMPKα phosphorylation in panel A. **C**, AAV-NC or AAV-SKP2 were subcutaneously injected into the bilateral inguinal areas, and mice were subjected to cold exposure (4°C) for

24 h before sacrifice. Representative immunoblotting images of the expression levels of Flag-tagged SKP2 and PRMT4 in iWAT. **D**, Quantitative analysis of the protein level of PRMT4 in panel C. **E**, Ubiquitination level of PRMT4 in iWAT following AAV-NC or AAV-SKP2 injection under RT or cold exposure. **F**, Effect of SKP2 on the stability of PRMT4. Treatment of HEK293T cells stably expressing PRMT4-HA with or without SKP2-Flag overexpression using 100  $\mu$ M cycloheximide (CHX) for the indicated time. The indicated proteins were measured by immunoblotting. **G**, Quantitative analysis of the protein level of PRMT4-HA in panel F. Data are presented as mean  $\pm$  SEM. \* $P$ <0.05, \*\* $P$ <0.01 and \*\*\* $P$ <0.001. ns, non-significant.

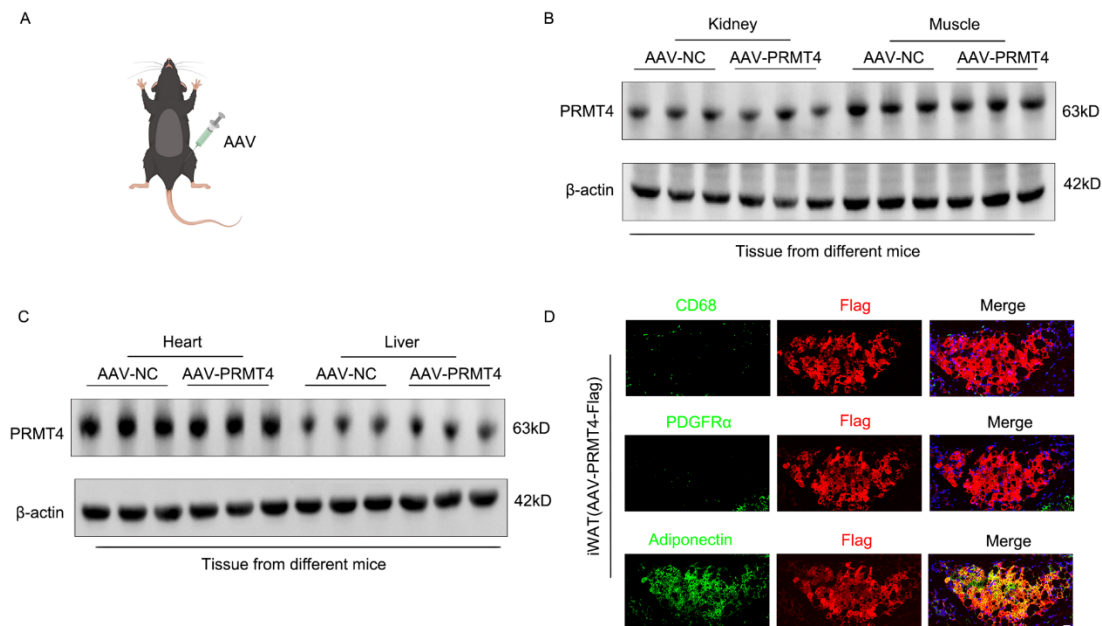

**Supplemental Fig. 3**

**Specific overexpression of PRMT4 in iWAT.**

**A**, Schematic diagram of local AAV injection subcutaneously into the bilateral

inguinal areas. **B-C**, Representative immunoblotting images of the expression level of PRMT4 in the indicated tissues from C57BL/6J mice after injection of AAV-NC or AAV-PRMT4 in iWAT.  $\beta$ -actin protein was used as the loading control. **D**, Representative immunofluorescence images for Flag (red), CD68 (macrophage marker, green), PDGFR $\alpha$  (preadipocyte marker, green), and Adiponectin (adipocyte marker, green) in iWAT after injection of AAV-PRMT4-Flag. Nuclei staining by DAPI (blue). Scale bar, 20  $\mu$ m.

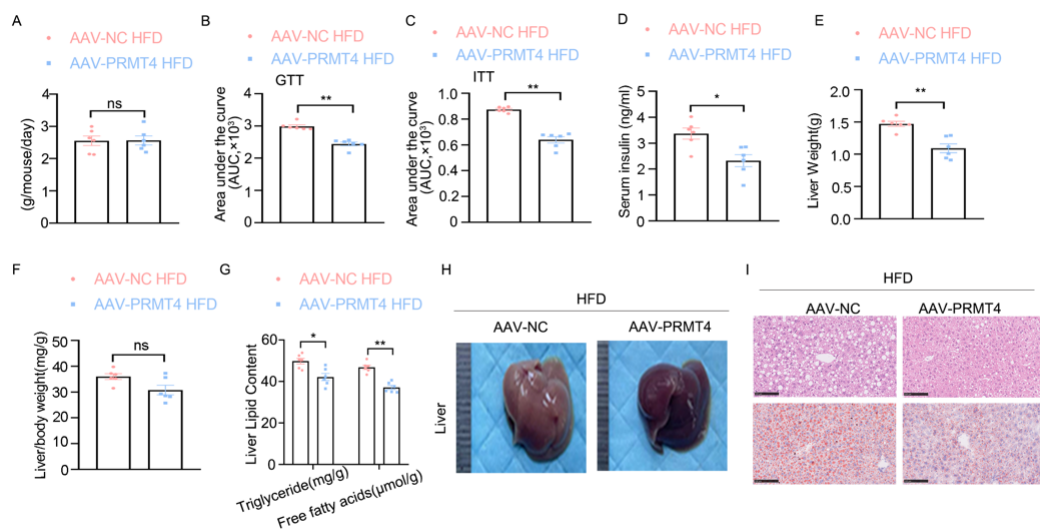

**Supplemental Fig. 4**

**PRMT4 overexpression in iWAT ameliorates diet-induced liver lipid accumulation.**

AAV-NC or AAV-PRMT4 was subcutaneously injected into the bilateral inguinal areas, two weeks later, the mice received 8 weeks of HFD. **A**, Food intake of the mice. **B**, Quantitative analysis of glucose tolerance test (GTT). **C**, Quantitative analysis of insulin tolerance test (ITT). **D**, Fasting serum insulin levels after 8 weeks of HFD. **E**, Liver weights of mice after 8 weeks of HFD. **F**, Liver/body weight ratio of mice after 8 weeks of HFD. **G**, Liver lipid content (triglycerides and free fatty acids) in mice. **H**, Gross morphology of the liver from mice after 8 weeks of HFD. **I**, Representative H&E

and Oil Red O staining of livers from mice after 8 weeks of HFD. Scale bar, 100  $\mu$ m.

Data are presented as mean  $\pm$  SEM. \* $P$ <0.05 and \*\* $P$ <0.01. ns, non-significant.

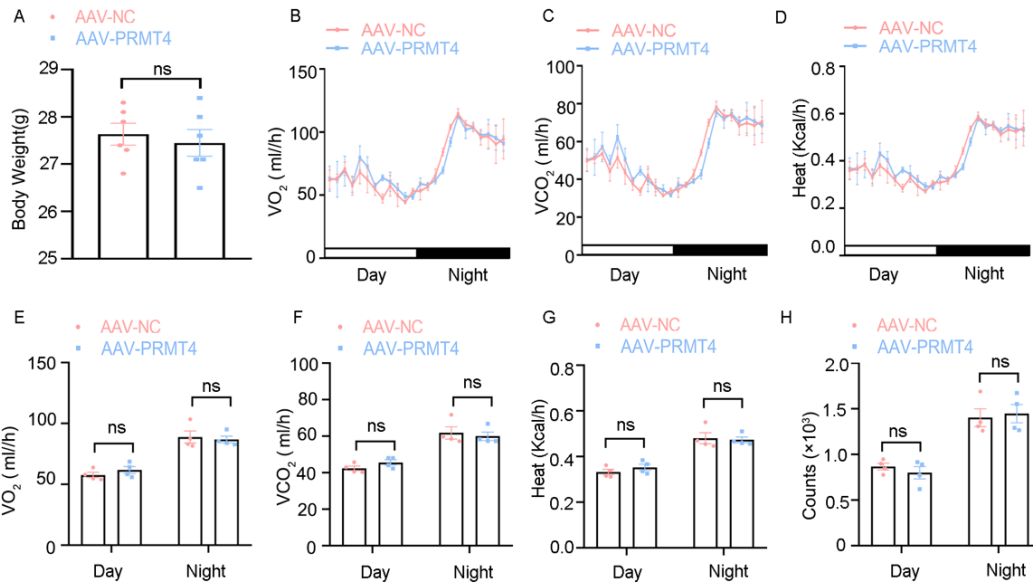

**Supplemental Fig. 5**

**PRMT4 overexpression did not affect energy consumption at RT.**

AAV-NC or AAV-PRMT4 were subcutaneously injected via the bilateral inguinal areas.

**A**, Body weight of the mice was recorded. The whole-body oxygen consumption rate

(VO<sub>2</sub>) (ml/h) (**B**), carbon dioxide production (VCO<sub>2</sub>) (ml/h) (**C**), and heat production

(**D**) of mice were measured using Columbus Oxymax metabolic chambers at RT. The

day/night bar represents a 12 h duration. **E**, Quantitative analysis of VO<sub>2</sub> in panel B. **F**,

Quantitative analysis of VCO<sub>2</sub> in panel C. **G**, Quantitative analysis of heat production

in panel D. VO<sub>2</sub>, VCO<sub>2</sub>, and heat production were analyzed by ANCOVA with total

body mass as covariate. **H**, Average physical activity for 24 h. Data are presented as

mean  $\pm$  SEM. ns, non-significant.

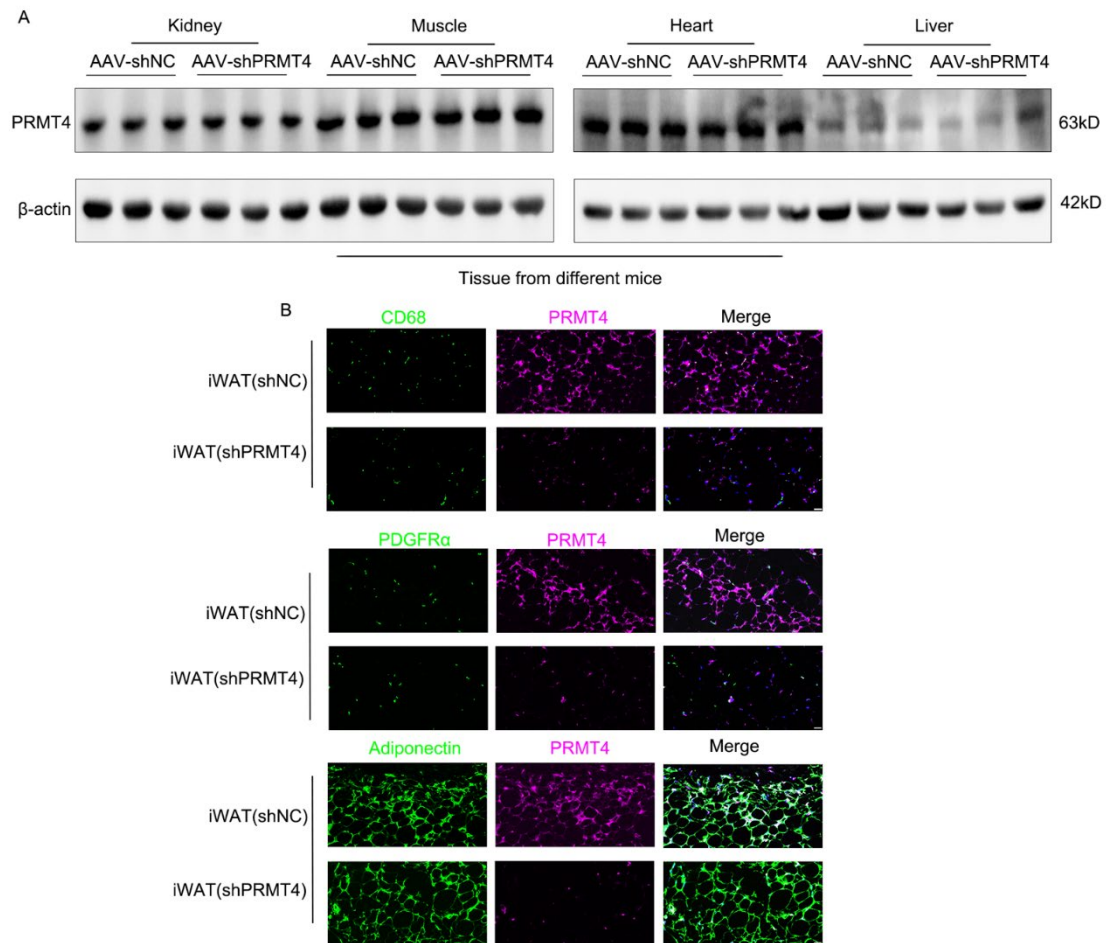

**Supplemental Fig. 6**

**Specific knockdown of PRMT4 in iWAT.**

**A**, Representative immunoblotting images of the expression level of PRMT4 in the indicated tissues from C57BL/6J mice with iWAT injection of AAV-shNC or AAV-shPRMT4.  $\beta$ -actin protein was used as the loading control. **B**, Representative immunofluorescence images for PRMT4 (purple), CD68 (macrophage marker, green), PDGFR $\alpha$  (preadipocyte marker, green), and Adiponectin (adipocyte marker, green) in iWAT after injection of AAV-shNC or AAV-shPRMT4. Nuclei staining by DAPI (blue). Scale bar, 20  $\mu$ m.

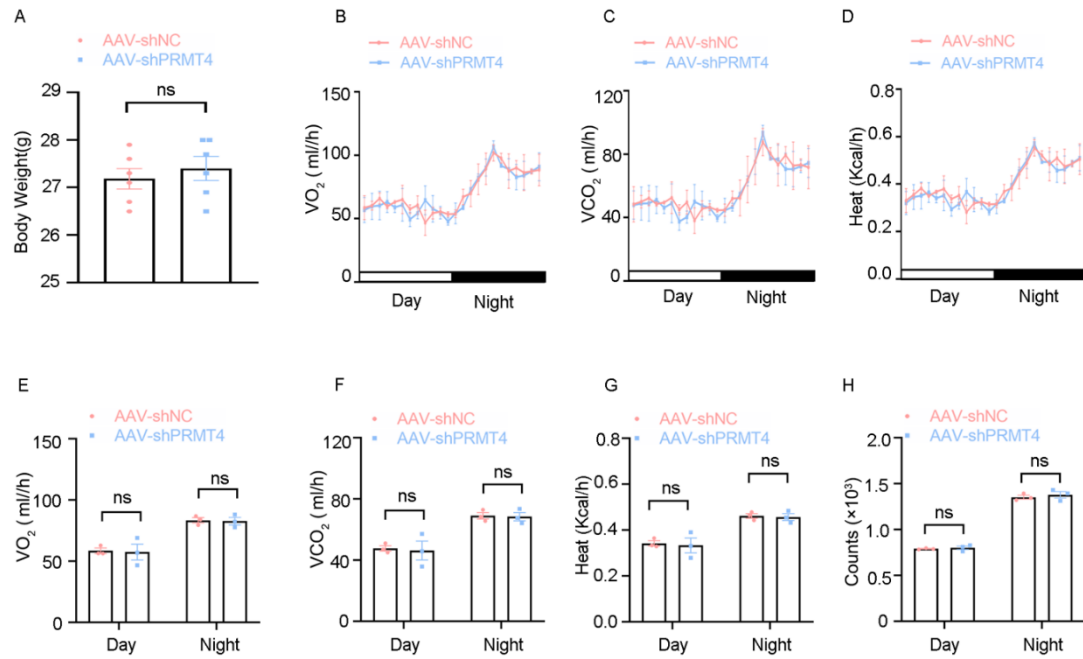

**Supplemental Fig. 7**

**PRMT4 knockdown did not affect energy consumption at RT.**

AAV-shNC or AAV-shPRMT4 were subcutaneously injected into the bilateral inguinal areas. **A**, Body weight of the mice was recorded. The whole-body oxygen consumption rate ( $VO_2$ ) (ml/h) (**B**), carbon dioxide production ( $VCO_2$ ) (ml/h) (**C**), and heat production (**D**) of mice were measured using Columbus Oxymax metabolic chambers at RT. The day/night bar represents a 12 h duration. **E**, Quantitative analysis of  $VO_2$  in panel B. **F**, Quantitative analysis of  $VCO_2$  in panel C. **G**, Quantitative analysis of heat production in panel D.  $VO_2$ ,  $VCO_2$ , and heat production were analyzed by ANCOVA with total body mass as covariate. **H**, Average physical activity for 24 h. Data are presented as mean  $\pm$  SEM. ns, non-significant.



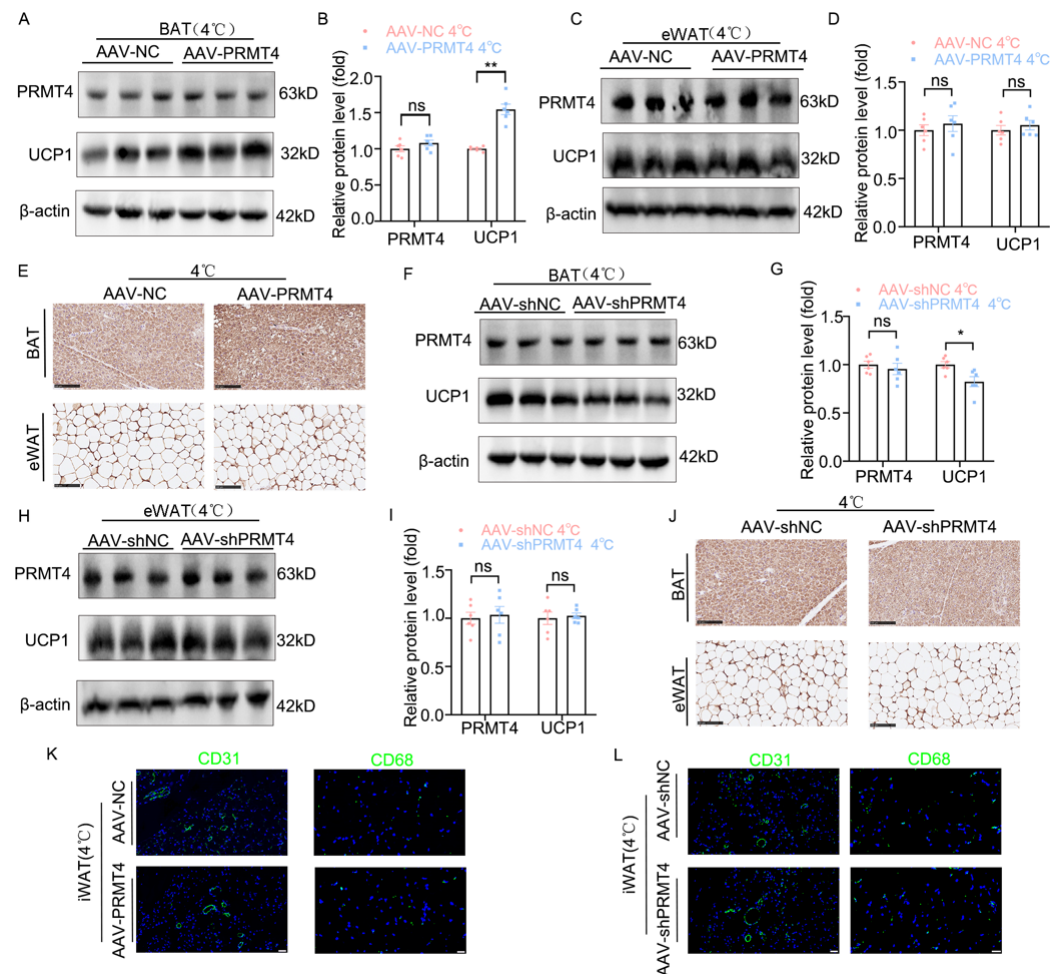

**Supplemental Fig. 8**

**Effects of iWAT PRMT4 modulation upon BAT and eWAT thermogenic program.**

**A**, Representative immunoblotting images of the expression levels of PRMT4 and UCP1 in BAT. **B**, Quantitative analysis of indicated protein expression in panel A. **C**, Representative immunoblotting images of the expression levels of PRMT4 and UCP1 in eWAT. **D**, Quantitative analysis of indicated protein expression in panel C. **E**, Representative images showing UCP1 immunohistochemistry in BAT and eWAT sections. Scale bar, 100 μm. **F**, Representative immunoblotting images of the expression levels of PRMT4 and UCP1 in BAT. **G**, Quantitative analysis of indicated protein expression in panel F. **H**, Representative immunoblotting images of the expression

121 levels of PRMT4 and UCP1 in eWAT. **I**, Quantitative analysis of indicated protein  
122 expression in panel H. **J**, Representative images showing UCP1 immunohistochemistry  
123 in BAT and eWAT sections. Scale bar, 100  $\mu$ m. **K**, Representative image showing  
124 immunofluorescence staining of CD31 (endothelial cell marker, green) or CD68  
125 (macrophage marker, green) in iWAT with injection of AAV-NC or AAV-PRMT4  
126 after cold exposure. Nuclei staining by DAPI (blue). Scale bar, 20  $\mu$ m. **L**,  
127 Representative image showing immunofluorescence staining of CD31 (endothelial cell  
128 marker, green) or CD68 (macrophage marker, green) in iWAT with injection of AAV-  
129 shNC or AAV-shPRMT4 after cold exposure. Nuclei staining by DAPI (blue). Scale  
130 bar, 20  $\mu$ m. Data are presented as mean  $\pm$  SEM. \*P<0.05 and \*\*P<0.01. ns, non-  
131 significant.

132

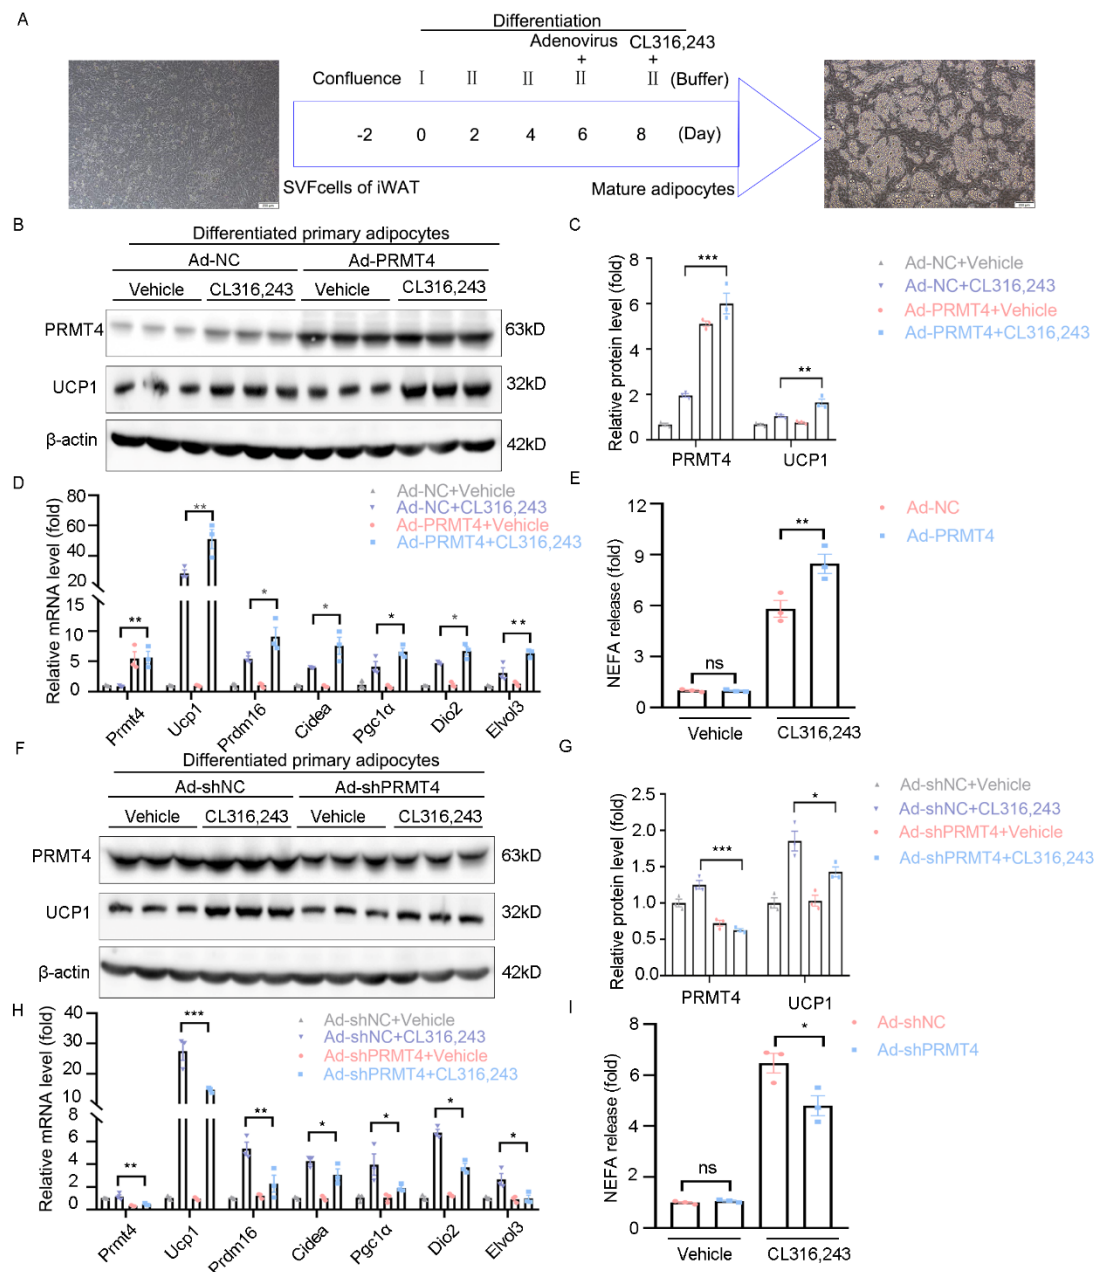

**Supplemental Fig. 9**

**PRMT4 regulated thermogenic program of SVF cells.**

SVF cells were isolated from iWAT of C57BL/6J mice and differentiated for 6 days into mature adipocytes, then the differentiated primary adipocytes were infected with the indicated adenovirus for 48 h and treated with CL316,243 (2 μM) for 4 h before harvested. **A**, Schematic illustration of in vitro differentiation of SVF cells isolated from iWAT. **B** and **F**, Representative immunoblotting images of the expression levels of

PRMT4 and UCP1 in the differentiated primary adipocytes after vehicle or CL316,243 administration. **C**, Quantitative analysis of the protein level of PRMT4 and UCP1 in panel B. **D** and **H**, Relative mRNA levels of the indicated genes in the differentiated primary adipocytes after vehicle or CL316,243 administration. **E** and **I**, Relative NEFA levels in the culture medium. **G**, Quantitative analysis of the protein level of PRMT4 and UCP1 in panel F. Data are presented as mean  $\pm$  SEM. \* $P$ <0.05, \*\* $P$ <0.01 and\*\*\* $P$ <0.001. ns, non-significant.

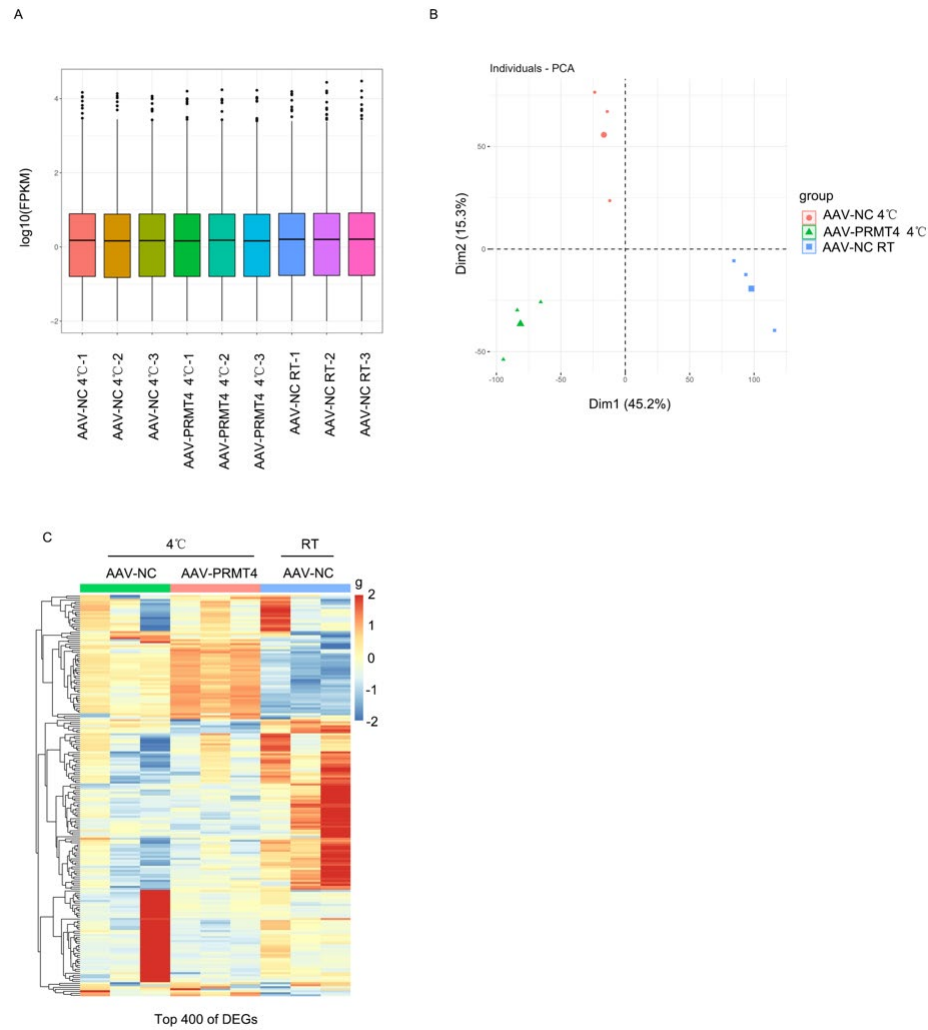

**Supplemental Fig. 10**

**Identification of PRMT4-regulated genes by RNA-seq analysis.**

**A**, The FPKM boxplot shows the distribution of gene expression levels among each sample. **B**, Principal component analysis (PCA) revealed global gene expression patterns upon cold stimulation or PRMT4 transduction in iWAT. **C** Hierarchical clustering revealed the top 400 differentially expressed genes (DEGs).

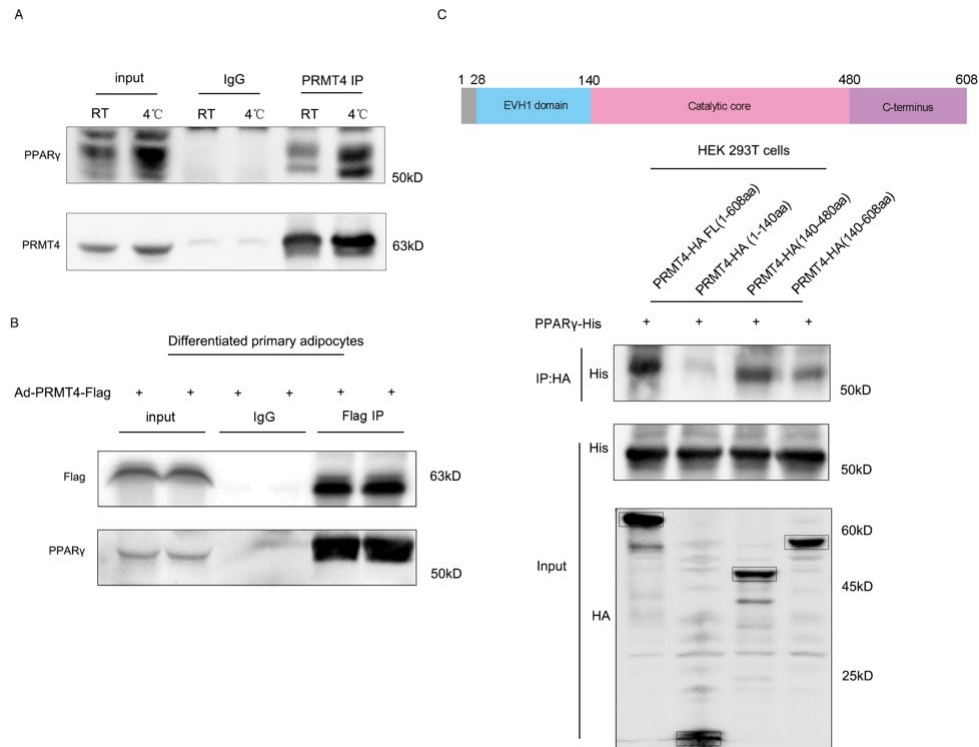

**Supplemental Fig. 11**

**PRMT4 interacted with PPAR $\gamma$ .**

**A**, iWAT tissues from mice were hosted at RT or 4 °C for 24 h, co-IP assay was conducted. **B**, SVF cells were isolated from iWAT of C57BL/6J mice and differentiated for 6 days into mature adipocytes, then the differentiated primary adipocytes were infected with Ad-PRMT4-Flag for 48 h and followed by co-IP assay. **C**, The interaction domains of PRMT4 with PPAR $\gamma$  were explored using full-length and deletion-mutated PRMT4 expression constructs based on co-IP assays.

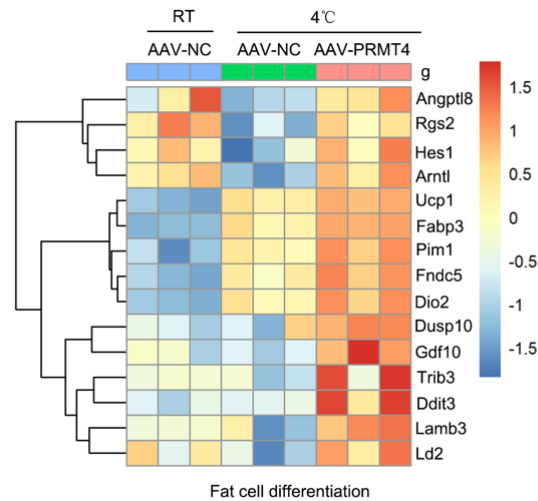

**Supplemental Fig. 12**

### DEGs were enriched in fat cell differentiation

Fat cell differentiation-related DEGs were shown. Heatmaps represents gene expression changes.

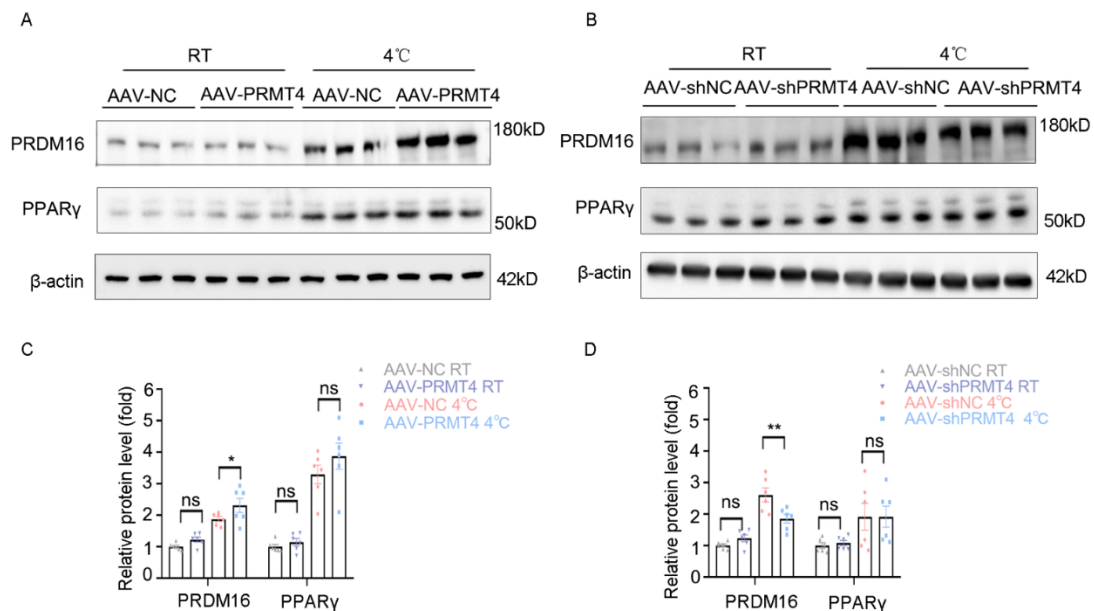

**Supplemental Fig. 13**

### PRMT4 regulated cold-induced PRDM16 expression in iWAT.

**A, B,** Representative immunoblotting images showing the expression levels of

PRDM16 and PPAR $\gamma$  in iWAT from mice injected with the indicated virus subcutaneously into bilateral inguinal areas. **C-D**, Quantitative analysis of the protein level of PRDM16 and PPAR $\gamma$  in panel A and B. Data are presented as mean  $\pm$  SEM. **\*\* $P$ <0.01 and\*\*\* $P$ <0.001, ns, non-significant.**

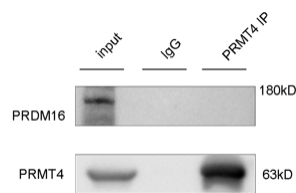

**Supplemental Fig. 14**

**PRMT4 did not directly interact with PRDM16**

Co-IP assay showed that PRMT4 did not bound to PRDM16 in iWAT.



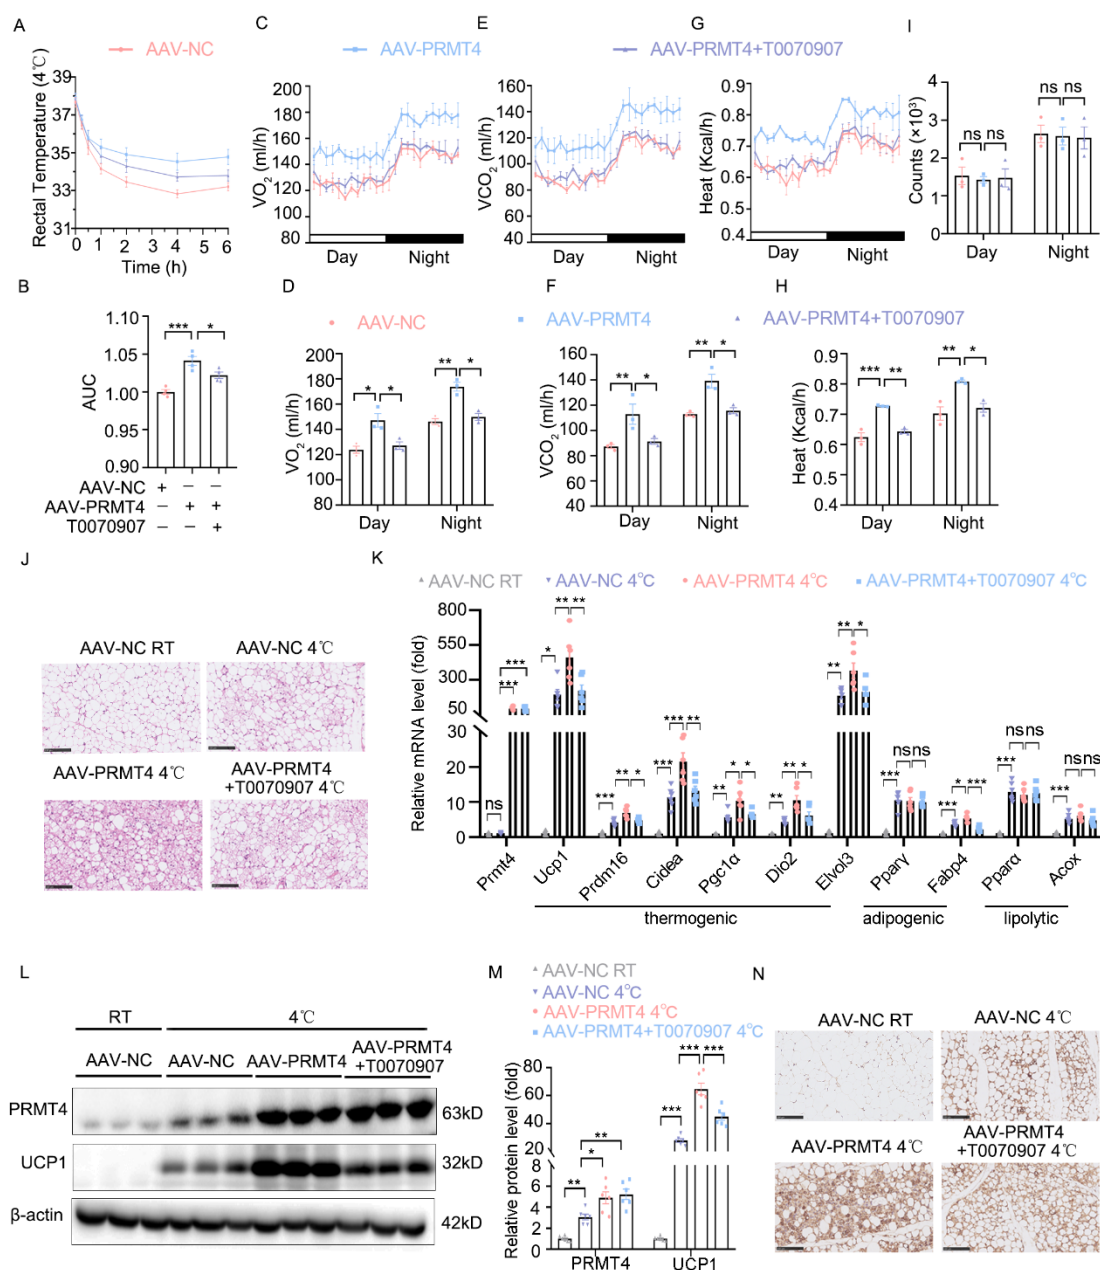

**Supplemental Fig. 15**

**Inhibition of PPAR $\gamma$  by T0070907 abolishes the effect of PRMT4 on thermogenic gene expression.**

**A**, The rectal temperature of mice during acute cold exposure (4°C) was monitored in the first 6 h. **B**, Quantitative analysis of rectal temperature in panel A. The oxygen consumption rate ( $VO_2$ ) (**C**), carbon dioxide production ( $VCO_2$ ) (**E**), and heat production (**G**) were analyzed. The day/night bar represents a 12 h duration. **D**,

Quantitative analysis of  $VO_2$  in panel C. **F**, Quantitative analysis of  $VCO_2$  in panel E. **H**, Quantitative analysis of heat production in panel G.  $VO_2$ ,  $VCO_2$ , and heat production were analyzed by ANCOVA with total body mass as covariate. **I**, Average values of physical activity. **J**, Representative HE staining of iWAT sections; scale bar, 100  $\mu$ m. **K**, Relative mRNA levels of thermogenic, adipogenic, and lipolytic genes. **L**, Representative immunoblotting images of the expression levels of PRMT4 and UCP1 in iWAT. **M**, Quantitative analysis of indicated protein level in panel L. **N**, Representative IHC images of UCP1 in iWAT sections were shown. Scale bar, 100  $\mu$ m. Data are presented as the mean  $\pm$  SEM. \* $P$ <0.05, \*\* $P$ <0.01 and\*\*\* $P$ <0.001. ns, non-significant.

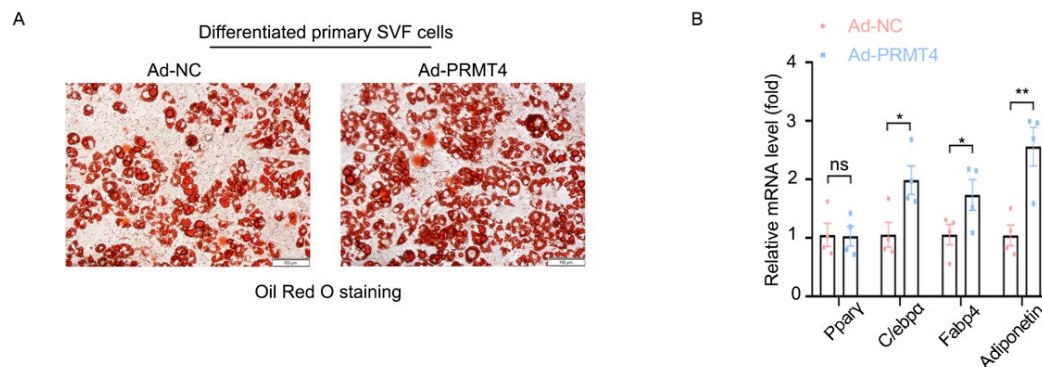

**Supplemental Fig. 16**

**PRMT4 overexpression promotes adipogenesis in vitro.**

SVF cells isolated from iWAT of C57BL/6J mice were infected with the indicated adenovirus and were then differentiated for 6 days into mature adipocytes in vitro. **A**, Representative Oil-red O staining of differentiated adipocytes on day 6. Scale bar, 100  $\mu$ m. **B**, Relative mRNA levels of the indicated genes in differentiated adipocytes on day 6. Data are presented as mean  $\pm$  SEM. \* $P$ <0.05, \*\* $P$ <0.01. ns, non-significant.

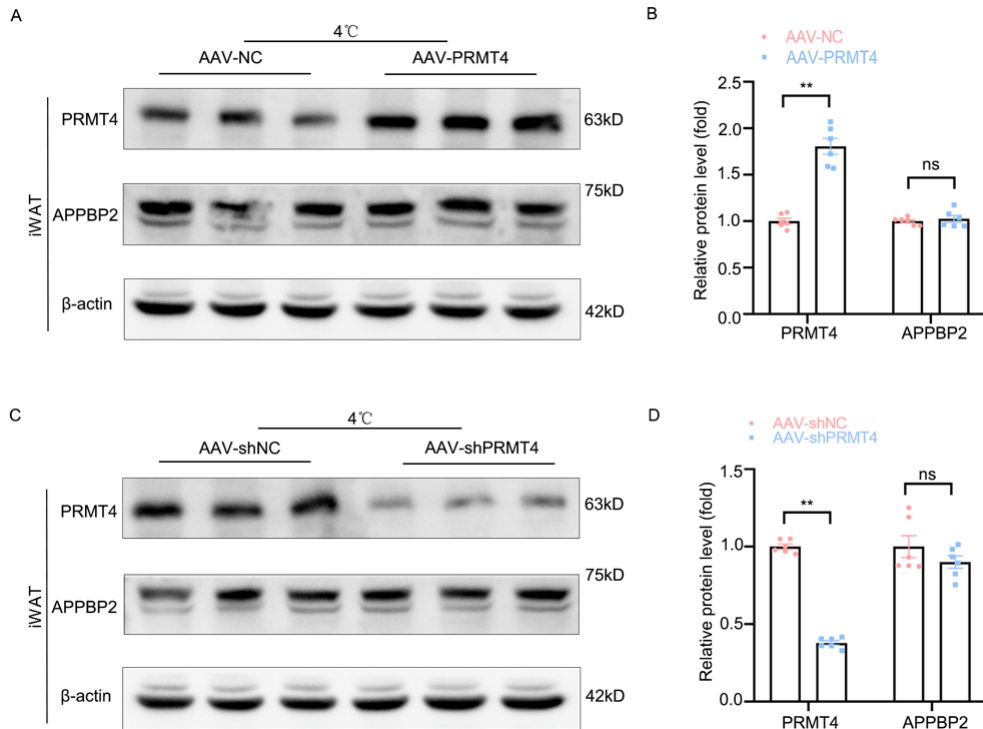

**Supplemental Fig. 17**

**PRMT4 overexpression or knockdown did not affect protein level of APPBP2 in iWAT upon cold exposure.**

AAV-NC, AAV-PRMT4, AAV-shNC or AAV-shPRMT4 was subcutaneously injected into the bilateral inguinal areas, two weeks later, mice were subjected to cold exposure (4°C) for 24 h before sacrifice. **A&C**, Representative immunoblotting images of the expression levels of PRMT4 and APPBP2 in iWAT. **B&D**, Quantitative analysis of indicated protein expression in panel A&C. Data are presented as mean  $\pm$  SEM.

\*\* $P < 0.01$ , ns, non-significant.

**Table S1.** Primers for qPCR

| Gene          | Forward 5'→3'           | Reverse 5'→3'           |
|---------------|-------------------------|-------------------------|
| h-β-actin     | GGCACCCAGCACAAATGAA     | GGAAGGTGGACAGCGAGG      |
| h-Prmt4       | TCGCCACACCCAACGATTT     | GTACTGCACGGCAGAAGACT    |
| h-Ucp1        | AGGTCCAAGGTGAATGCCC     | TTACCACAGCGGTGATTGTTC   |
| m-18S         | TTGACGGAAGGGCACCACCAG   | GCACCACCACCCACGGAATCG   |
| m-Prmt4       | TGACATCAGTATTGTGGCACAG  | CTGAGGAGCCTAAGGGAATCA   |
| m-Ucp1        | AGGCTTCCAGTACCATTAGGT   | CTGAGTGAGGCAAAGCTGATTT  |
| m-Pgc1α       | GGTTGAAAAAGCTTGACTGGCG  | ACCAACCAGAGCAGCACACT    |
| m-Elvol3      | TTCTCACGCGGGTTAAAAATGG  | TCTCGAAGTCATAGGGTTGCAT  |
| m-Prdm16      | CCAAGGCAAGGGCGAAGAA     | AGTCTGGTGGGATTGGAATGT   |
| m-Dio2        | AATTATGCCTCGGAGAAGACCG  | GGCAGTTGCCTAGTGAAAGGT   |
| m-Ppara       | AGAGCCCCATCTGTCCTCTC    | ACTGGTAGTCTGCAAAACCAAA  |
| m-Acox        | AAATATGCCCAGGTGAAGCC    | CACTGTATCGAATGGCAATGG   |
| m-Pparγ       | TCGCTGATGCACTGCCTATG    | GAGAGGTCCACAGAGCTGATT   |
| m-Fabp4       | AAGGTGAAGAGCATCATAACCCT | TCACGCCTTTCATAACACATTCC |
| m-Adiponectin | TGTTCCCTCTTAATCCTGCCCA  | CCAACCTGCACAAGTTCCCTT   |
| m-C/ebpα      | CAAGAACAGCAACGAGTACCG   | GTCACTGGTCAACTCCAGCAC   |
